# Supplementary material for: Endophytic Capacity of Entomopathogenic Fungi in a Pasture Grass and Their Potential to Control the Spittlebug Mahanarva spectabilis (Hemiptera: Cercopidae)
Source: MDPI journal article supplement (doi:10.3390/agronomy14050943), 2024-04-30
Supplement: s1 [file s1]

**Supplementary Table S1.** Confirmation of fungi applied via foliar or seed of *Urochloa ruziziensis* isolated from nymphs feeding on these plants in the field or greenhouse, and from plant tissue after infestation. GenBank accessions of the sequences.

| Fungi applied <sup>*1</sup>   | Isolate<br>Habitat/Host                              | Molecular analyses                                                    | GenBank  |
|-------------------------------|------------------------------------------------------|-----------------------------------------------------------------------|----------|
| <i>Fusarium multiceps</i>     | Nymphs from the<br>field                             | <i>Fusarium multiceps</i>                                             | OR966865 |
| <i>Metarhizium anisopliae</i> |                                                      | <i>Metarhizium anisopliae</i> or<br><i>M. robertsii</i> <sup>*2</sup> | OR975641 |
| <i>Fusarium multiceps</i>     |                                                      | <i>Fusarium multiceps</i>                                             | OR975647 |
| <i>Metarhizium anisopliae</i> |                                                      | <i>Metarhizium anisopliae</i> or<br><i>M. robertsii</i> <sup>*2</sup> | OR975648 |
| <i>Fusarium multiceps</i>     | Nymphs from the<br>Greenhouse                        | <i>Fusarium multiceps</i>                                             | OR975642 |
| <i>Metarhizium anisopliae</i> |                                                      | <i>Metarhizium anisopliae</i> or<br><i>M. robertsii</i> <sup>*2</sup> | OR975651 |
| <i>Fusarium multiceps</i>     |                                                      | <i>Fusarium multiceps</i>                                             | OR975643 |
| <i>Metarhizium anisopliae</i> |                                                      | <i>Metarhizium anisopliae</i> or<br><i>M. robertsii</i> <sup>*2</sup> | OR975644 |
| <i>Fusarium multiceps</i>     | Leaf samples from<br>plants inoculated<br>via seed   | <i>Fusarium multiceps</i>                                             | OR966859 |
| <i>Metarhizium anisopliae</i> |                                                      | <i>Metarhizium anisopliae</i> or<br><i>M. robertsii</i> <sup>*2</sup> | OR975646 |
| <i>Fusarium multiceps</i>     | Leaf samples from<br>plants inoculated<br>via foliar | <i>Fusarium multiceps</i>                                             | OR966860 |
| <i>Metarhizium anisopliae</i> |                                                      | <i>Metarhizium anisopliae</i> or<br><i>M. robertsii</i> <sup>*2</sup> | OR966861 |
| <i>Fusarium multiceps</i>     | Sap samples from<br>plants inoculated<br>via seed    | <i>Fusarium multiceps</i>                                             | OR966862 |
| <i>Metarhizium anisopliae</i> |                                                      | <i>Metarhizium anisopliae</i> or<br><i>M. robertsii</i> <sup>*2</sup> | OR966863 |
| <i>Fusarium multiceps</i>     | Sap samples from<br>plants inoculated<br>via foliar  | <i>Fusarium multiceps</i>                                             | OR966864 |
| <i>Metarhizium anisopliae</i> |                                                      | <i>Metarhizium anisopliae</i> or<br><i>M. robertsii</i> <sup>*2</sup> | OR966866 |

<sup>\*1</sup>The fungi applied *Fusarium multiceps* UFMGCB 11443 (GenBank=ON831395) and *Metarhizium anisopliae* UFMGCB 11444 (GenBank=ON831396). <sup>\*2</sup>ITS region does not allow these species to be distinguished.
